# Supplementary material
Source: HighWire-hosted journal article supplement (https://diabetes.diabetesjournals.org/content/suppl/2006/09/27/55.10.2669)

# Supplemental Figure 1

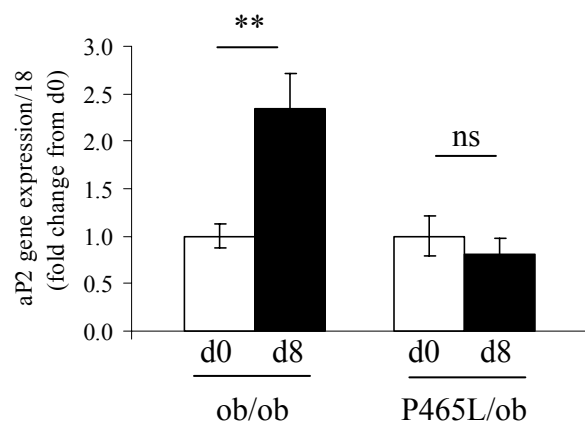

Supplement: PG2669OnlineAppendix.pdf [file PG2669OnlineAppendix.pdf]
